# Supplementary material for: Tropical postbiotics alleviate the disorders in the gut microbiota and kidney damage induced by ochratoxin A exposure
Source: Royal Society of Chemistry journal article supplement (doi:10.1039/d3fo05213c), 2024-01-01
Supplement: d3fo05213c1.xlsx [file d3fo05213c1.xlsx]

## Sheet: Sheet1
Supplementary Table S1:
Sheet2: The relative abundance of species with differences among groups
Sheet3: The relative abundance of metabolic pathways with differences among groups
Sheet4: The relative abundance of virulence factors with differences among groups

## Sheet: Sheet2
The relative abundance of species with differences among groups
Species name	Control1	Control2	Control3	Control4	Control5	Control6	Model1	Model2	Model3	Model4	Model5	Model6	Probiotics1	Probiotics2	Probiotics3	Probiotics4	Probiotics5	Probiotics6	Placebo1	Placebo2	Placebo3	Placebo4	Placebo5	Placebo6
Bacteroides_uniformis	1.0413	1.11657	0.33274	1.41051	1.10055	1.03745	0.27702	0.39095	0.29808	0.46993	0.30491	0.22714	0.47708	1.7811	0.3672	0.5928	0.41265	0.25373	0.83569	0.5299	1.36744	0.75242	1.34789	0.52745
Prevotella_sp_MGM2	11.845	32.3278	17.6137	33.4487	22.9863	20.5553	7.16297	11.215	9.71689	13.5248	8.21043	4.97709	15.9658	16.6246	5.8058	12.4427	10.7781	7.76446	23.948	9.78909	17.2284	20.6105	12.781	14.8803
Bacteroides_caecimuris	1.73055	1.68478	0.97564	2.9469	1.84241	1.66734	0.68593	0.78456	1.13608	1.64202	0.75887	0.56629	1.86325	4.16374	0.85611	1.4931	1.47197	0.99561	2.16683	0.80325	2.37202	1.70829	1.29128	1.56953
Parabacteroides_johnsonii	0.00963	0.03002	0.01311	0	0	0.02147	0.04714	0.07481	0.01891	0.13321	0.12509	0.0734	0.07552	0	0.03615	0.10136	0.05672	0.03616	0.00663	0.00538	0.08829	0.01313	0.02933	0.00331
Acutalibacter_muris	1.85199	0.37673	0.32025	1.65176	0.66385	0.1833	0.26899	0.0431	0.1566	0.10387	0.08552	0.16371	0.38578	0.24415	0.41093	0.13619	0.05688	0.40897	0.70363	0.04558	0.46917	0.52686	0.60216	0.20809
Lachnospiraceae_bacterium_A4	0.00164	0	0	0	0	0	0.02467	0.01853	0.08307	0.04163	0.02726	0.02878	0.00781	0	0.226	0.01419	0.00604	0.03547	0.02116	0.01326	0.01658	0.01472	0.03946	0.0361
Lactobacillus_murinus	28.5898	4.59701	3.11824	16.9235	8.12848	14.8072	2.20505	2.41535	1.97248	1.23701	4.8427	7.63928	2.0757	13.3385	5.1031	4.85196	2.52337	2.80367	5.08859	3.17196	4.06855	14.6571	4.00287	3.55393
Faecalibaculum_rodentium	0	0	17.2701	0.32798	0.77435	0.98868	19.0299	11.926	12.4081	7.49466	14.9122	12.9534	15.5311	5.80345	2.94623	17.3206	14.5347	8.06844	3.22115	16.1803	3.39395	2.41883	14.6416	7.96788
Alistipes_indistinctus	0	0.07513	0.02867	0	0	0.00782	0.02056	0.09643	0.08068	0.13873	0.09613	0.10789	0.07636	0	0.01185	0.13213	0.022	0.08874	0.0211	0.08188	0.19548	0.00314	0.07026	0.06792
Lactobacillus_reuteri	0.92664	0.11785	0	0.29214	0	0.03679	2.22277	2.14483	5.08043	3.38337	2.91654	0.83835	1.89445	0.03343	3.02975	0.23742	1.19043	0.81088	0.61836	4.58244	0.87584	1.68573	4.61206	1.18102
Alistipes_shahii	0.08102	0.36754	0.14006	0.08882	0.12406	0.13393	0.25806	0.44257	0.6032	0.70466	0.56607	0.62983	0.32396	0.11357	0.58812	0.5213	0.31157	0.25883	0.36275	0.53557	0.46931	0.42428	0.68848	0.47396
Bacteroides_dorei	0.30548	0.40617	0.14012	0.22731	0.45552	0.29592	0.08433	0.06223	0.06847	0.21108	0.0629	0.04456	0.0846	0.69002	0.10649	0.27586	0.16723	0.02627	0.20271	0.02975	0.14457	0.15173	0.07525	0.06683
Turicimonas_muris	0	0.03203	0.22591	0.08332	0.06522	0.0293	0.31131	0.10894	0.22311	0.3304	0.58088	0.17821	0.53754	0.41292	0.11652	0.39009	0.56156	0.14426	0.27831	1.43689	0.1397	0.30585	1.12467	0.30973
Parabacteroides_merdae	0.03793	0.07166	0.08192	0.07945	0.0589	0.15568	0.17644	0.23652	0.27855	0.16583	0.25206	0.37524	0.24337	0.04932	0.05493	0.22036	0.12366	0.22534	0.24325	0.79835	0.04178	0.16458	0.23135	0.30819
Lachnospiraceae_bacterium_A2	3.00584	0.05987	0	0.07047	1.00359	0.05077	0	0	0	0	0	0	0	0	0.13122	0.0096	0	0	0	0	0	0	0	0
Bifidobacterium_pseudolongum	0	0	0	0	0	0.0255	7.42718	2.75022	0.10048	0.85982	4.49591	4.42194	0	0	0	0	0	0	0	0	0	0	0	0
Lactobacillus_johnsonii	0	0.02709	0	0	0	0	2.82113	5.60985	5.47656	6.89437	3.5685	2.90288	2.17103	0.03685	1.08219	2.41827	1.7962	2.15438	1.21685	6.214	1.52705	1.50026	7.57229	1.28672
Bacteroides_massiliensis	0	0	0	0	0	0.0022	0.01253	0.00446	0.01223	0.01559	0	0.00529	0	0	0	0.00278	0.00199	0	0.01496	0.01674	0	0.01453	0.0084	0.00518
Lachnospiraceae_bacterium_10_1	0.28295	0	0	0	0	0	0.41111	0.0164	2.46264	0.36576	0.0448	0.32429	0	0	0	0	0.14686	0	0.54987	0.29219	0	0.32249	0.71537	0.0724
Lachnospiraceae_bacterium_COE1	0.00334	0	0.01421	0	0.02058	0.01279	0.04635	0.00962	0.02576	0.00894	0.01588	0.01201	0	0	0.01573	0	0.0054	0.00091	0.4855	0.46589	0	0.24676	0.8939	0.10357
Dorea_sp_5_2	0.17513	0.01182	0.01578	0.07592	0.14179	0.02121	0.01819	0.00751	0.08046	0.02798	0.02085	0.00466	0.12324	0.10257	0.08233	0.02241	0.04841	0.18844	0.02926	0	0.15472	0.02289	0.03804	0.04951
Mucispirillum_schaedleri	8.34318	0.81497	0.27377	1.66344	2.38703	0.27472	0.42819	0.42357	21.6527	0.40612	0.43937	1.02696	0.66244	4.94705	35.4647	2.20582	1.03719	27.0325	1.51152	0.27614	16.474	1.23077	0.93842	0.57482
Proteobacteria_bacterium_CAG_139	0	0.00147	0.21338	0.00223	0	0	0.0411	0.04978	0.0216	0.02332	0.03459	0.12591	0.00665	0	0	0.01164	0.02331	0	0.00287	0.13636	0.00642	0	0.1146	0.09568
Parasutterella_excrementihominis	0.65635	0.58772	3.86155	0.72414	0.62669	0.43916	0.99811	1.06795	1.52974	0.56629	0.96269	2.05371	0.56562	0.61928	0.32034	0.95862	0.87041	0.14735	0.2607	2.66884	0.80846	0.18731	2.61866	2.11604
Bacteroides_thetaiotaomicron	0.21538	0.34958	0.02072	0.04985	0.19822	0.05478	0.01087	0.06703	0.0527	0.06221	0.03565	0.04036	0.09826	0.22543	0.04631	0.24384	0.05169	0.07556	0.24717	0.12196	0.33605	0.16202	0.14931	0.10935
Parabacteroides_distasonis	0.19053	0.81523	0.44924	0.64828	0.25483	0.34221	0.46708	0.39282	0.3488	0.60098	0.59702	0.46611	0.95713	1.2039	0.40401	0.71683	0.43528	0.42518	1.04424	0.87235	0.95493	0.75459	0.85096	0.75003
Muribaculum_intestinale	12.2917	15.0847	13.9451	13.6379	16.1171	9.00777	10.0337	11.557	11.9303	13.7303	11.426	10.2574	10.3117	24.5113	11.1456	20.0844	16.1914	8.74485	15.4144	16.7209	18.8286	13.9678	13.7587	17.3338
Lachnospiraceae_bacterium_28_4	0	0.00624	0	0	0.0615	0	0.00807	0	0	0	0	0	0.00077	0	0	0	0	0.01742	1.33825	0.33167	0.13732	0.81476	1.08292	0.1156
Bacteroides_intestinalis	0.09659	0.01961	0.02385	0.13424	0.0015	0.02893	0.0337	0.01889	0.06291	0.07748	0.07041	0.00256	0.05479	0.28395	0	0.13946	0.08481	0.05418	0.48016	0.06839	0.13545	0.40098	0.0975	0.11792

## Sheet: Sheet3
The relative abundance of metabolic pathways with differences among groups
PWY	Control1	Control2	Control3	Control4	Control5	Control6	Model1	Model2	Model3	Model4	Model5	Model6	Probiotics1	Probiotics2	Probiotics3	Probiotics4	Probiotics5	Probiotics6	Placebo1	Placebo2	Placebo3	Placebo4	Placebo5	Placebo6
PWY-622: starch biosynthesis	1e-10	1e-10	1e-10	1e-10	1e-10	1e-10	412.315	426.161	1e-10	141.746	531.316	465.541	1e-10	1e-10	1e-10	1e-10	1e-10	1e-10	1e-10	1e-10	1e-10	1e-10	1e-10	1e-10
PWY0-1061: superpathway of L-alanine biosynthesis	1e-10	1e-10	1e-10	35.4059	1e-10	1e-10	359.768	233.142	48.7562	84.6571	254.342	224.382	13.4369	1e-10	97.6783	22.3685	22.6883	1e-10	48.2201	129.479	25.1042	58.6643	26.7792	55.7393
HEXITOLDEGSUPER-PWY: superpathway of hexitol degradation (bacteria)	1e-10	1e-10	1e-10	1e-10	1e-10	1e-10	1e-10	1e-10	117.338	1e-10	1e-10	1e-10	1e-10	1e-10	1e-10	1e-10	1e-10	1e-10	1e-10	1e-10	1e-10	1e-10	1e-10	1e-10
PWY-6470: peptidoglycan biosynthesis V (&beta;-lactam resistance)	1e-10	1e-10	1e-10	1e-10	1e-10	1e-10	42.7087	1e-10	1e-10	1e-10	1e-10	1e-10	1e-10	1e-10	1e-10	1e-10	1e-10	1e-10	1e-10	1e-10	1e-10	1e-10	1e-10	1e-10
GALACTITOLCAT-PWY: galactitol degradation	1e-10	1e-10	1e-10	1e-10	1e-10	1e-10	1e-10	1e-10	39.9641	1e-10	1e-10	1e-10	1e-10	1e-10	1e-10	1e-10	1e-10	1e-10	1e-10	1e-10	1e-10	1e-10	1e-10	1e-10
PWY-6531: mannitol cycle	22.5348	1e-10	1e-10	1e-10	1e-10	1e-10	1e-10	1e-10	1e-10	1e-10	1e-10	1e-10	1e-10	1e-10	21.1745	1e-10	1e-10	1e-10	1e-10	1e-10	24.5604	1e-10	1e-10	1e-10
METHGLYUT-PWY: superpathway of methylglyoxal degradation	1e-10	1e-10	1e-10	1e-10	1e-10	1e-10	16.1829	1e-10	1e-10	1e-10	1e-10	11.159	1e-10	1e-10	1e-10	1e-10	1e-10	1e-10	1e-10	1e-10	1e-10	1e-10	1e-10	1e-10
PWY1ZNC-1: assimilatory sulfate reduction IV	24.2209	1e-10	1e-10	1e-10	1e-10	1e-10	1e-10	24.2399	132.61	79.3035	1e-10	21.1818	1e-10	1e-10	17.5369	1e-10	1e-10	1e-10	1e-10	12.6637	1e-10	1e-10	39.7004	1e-10
PWY-7115: C4 photosynthetic carbon assimilation cycle, NAD-ME type	1e-10	1e-10	1e-10	37.2347	1e-10	1e-10	314.246	232.688	69.5588	118.778	243.731	230.271	21.361	1e-10	80.4983	34.0054	34.7862	1e-10	61.183	153.516	35.5454	72.0864	42.0387	68.6015
P122-PWY: heterolactic fermentation	47.9451	1e-10	1e-10	1e-10	1e-10	1e-10	226.457	228.147	256.213	224.154	236.202	283.651	73.8423	1e-10	132.581	1e-10	95.7191	79.078	61.8108	166.535	55.5942	131.096	214.985	53.9383
PWY-5913: partial TCA cycle (obligate autotrophs)	1e-10	10.5311	1e-10	12.7023	1e-10	1e-10	220.623	429.132	288.96	149.498	181.001	318.069	124.217	1e-10	39.3614	122.16	96.2901	135.13	65.2898	216.071	61.0537	68.271	219.999	81.918
PWY-6936: seleno-amino acid biosynthesis (plants)	40.2798	26.6559	1e-10	1e-10	1e-10	1e-10	426.399	559.043	499.878	627.364	424.962	330.187	295.78	1e-10	170.039	105.216	215.154	123.757	104.977	490.522	91.1457	173.136	438.915	165.553
PWY0-166: superpathway of pyrimidine deoxyribonucleotides de novo biosynthesis (E. coli)	48.6014	1e-10	1e-10	30.5935	1e-10	1e-10	429.262	276.977	476.358	441.43	367.685	97.4436	153.589	1e-10	153.083	61.9038	134.163	98.3774	67.8814	412.704	120.237	237.478	400.269	116.639
ARG+POLYAMINE-SYN: superpathway of arginine and polyamine biosynthesis	1e-10	1e-10	1e-10	60.8452	1e-10	1e-10	57.444	38.5093	151.248	126.807	40.513	1e-10	39.3429	1e-10	1e-10	1e-10	1e-10	1e-10	80.1007	71.8875	1e-10	55.5187	64.4675	1e-10
POLYAMSYN-PWY: superpathway of polyamine biosynthesis I	1e-10	1e-10	1e-10	31.0043	1e-10	1e-10	29.2129	19.4343	81.6753	65.2486	20.5369	1e-10	19.8637	1e-10	1e-10	1e-10	1e-10	1e-10	40.8715	36.5984	1e-10	28.2307	32.7042	1e-10

## Sheet: Sheet4
The relative abundance of virulence factors with differences among groups
Virulence factor	Annotation	Control1	Control2	Control3	Control4	Control5	Control6	Model1	Model2	Model3	Model4	Model5	Model6	Probiotics1	Probiotics2	Probiotics3	Probiotics4	Probiotics5	Probiotics6	Placebo1	Placebo2	Placebo3	Placebo4	Placebo5	Placebo6
VF0325	Type IV secretion system protein VirB4	1e-09	1e-09	1e-09	1e-09	1e-09	1e-09	0.00691527	0.0135262	1e-09	1e-09	0.00214457	0.00834309	1e-09	1e-09	1e-09	1e-09	1e-09	1e-09	1e-09	1e-09	1e-09	1e-09	1e-09	1e-09
VF0401	type IV pilus biosynthesis protein PilL	1e-09	1e-09	1e-09	1e-09	1e-09	1e-09	0.00625047	0.0105793	1e-09	1e-09	0.00160469	0.0103934	1e-09	1e-09	1e-09	1e-09	1e-09	1e-09	1e-09	1e-09	1e-09	1e-09	1e-09	1e-09
VF0174	BfpB secretin	1e-09	1e-09	1e-09	1e-09	1e-09	1e-09	0.00575388	0.0121555	1e-09	1e-09	0.00149697	0.00834683	1e-09	1e-09	1e-09	1e-09	1e-09	1e-09	1e-09	1e-09	1e-09	1e-09	1e-09	1e-09
VF0126	toxin-coregulated pilus biosynthesis outer membrane protein TcpC	1e-09	1e-09	1e-09	1e-09	1e-09	1e-09	0.00575388	0.0121555	1e-09	1e-09	0.00149697	0.00834683	1e-09	1e-09	1e-09	1e-09	1e-09	1e-09	1e-09	1e-09	1e-09	1e-09	1e-09	1e-09
VF0436	D-glycero-d-manno-heptose 1-phosphate guanosyltransferase	1e-09	0.00129617	0.000689812	0.000453099	0.000694323	0.000437166	0.00265959	0.00461146	0.00332922	0.00604363	0.00380416	0.00237991	0.00380099	1e-09	0.000301329	1e-09	0.00173297	0.000826212	1e-09	9.9297e-05	0.000372717	0.00112209	0.00081662	1e-09
VF0113	ferric iron uptake transcriptional regulator	1e-09	1e-09	1e-09	1e-09	1e-09	1e-09	0.00555511	0.00135186	0.000106982	0.00031958	0.00377425	0.000877226	1e-09	1e-09	1e-09	1e-09	1e-09	1e-09	1e-09	1e-09	1e-09	1e-09	1e-09	1e-09
VF0696	Coxiella Dot/Icm type IVB secretion system translocated effector	1e-09	1e-09	1e-09	1e-09	1e-09	1e-09	0.0031616	0.00807859	0.0019712	0.00604762	0.00366017	0.00160179	0.0027908	1e-09	8.95523e-05	0.00171358	0.00265641	0.00118167	0.000348828	0.00413135	0.000387685	0.000972624	0.003166	0.000864572
VF0552	biotin synthase	0.000118886	1e-09	1e-09	8.31117e-05	1e-09	0.000320754	0.000139385	0.00284925	0.000864336	0.00314329	0.000418674	0.000667653	1e-09	0.000225869	1e-09	0.000161165	1e-09	0.000126293	0.000246058	0.00145709	0.000455777	1e-09	0.00010894	6.77624e-05
VF0323	phosphatase	1e-09	1e-09	1e-09	1e-09	1e-09	1e-09	0.000461996	0.00098375	0.000996483	0.00176744	0.000462572	0.000425572	0.00018125	1e-09	1e-09	1e-09	1e-09	1e-09	0.000203893	0.0012074	1e-09	1e-09	0.000631896	1e-09
VF0239	NeuD protein involved in sialic acid synthesis	9.85136e-05	1e-09	1e-09	1e-09	1e-09	1e-09	0.0001155	0.0019675	0.000747363	0.0012093	0.000346929	0.000425572	9.06256e-05	1e-09	0.000209375	1e-09	1e-09	0.000167441	1e-09	0.000724442	0.00015107	0.000227403	0.000631896	0.0001123
VF0394	flagellar capping protein FliD	0.000282286	1e-09	1e-09	1e-09	0.000403206	0.000253871	0.000772236	0.000892654	0.000267694	0.00102179	0.0011598	0.000691029	0.000692487	1e-09	0.000624953	0.000446453	0.000529667	9.99584e-05	0.000632935	0.0026525	1e-09	0.000380109	0.0011209	0.00101901
VF0228	ferrienterobactin ABC transporter periplasmic binding protein	1e-09	1e-09	0.000245078	1e-09	1e-09	1e-09	1e-09	0.00068984	0.000436731	0.0014677	0.000405465	0.000149213	1e-09	1e-09	1e-09	0.00011706	1e-09	0.000220154	0.000178721	0.000423337	1e-09	1e-09	0.000712137	1e-09
VF0373	flagellar P-ring protein FlgI	1e-09	1e-09	1e-09	1e-09	1e-09	1e-09	0.000702893	1e-09	0.00050536	0.000377409	0.000234591	0.000172661	1e-09	1e-09	1e-09	1e-09	1e-09	1e-09	1e-09	1e-09	1e-09	0.000461302	1e-09	1e-09
VF0051	flagellar P-ring protein precursor FlgI	1e-09	1e-09	1e-09	1e-09	1e-09	1e-09	0.000702893	1e-09	0.00050536	0.000377409	0.000234591	0.000172661	1e-09	1e-09	1e-09	1e-09	1e-09	1e-09	1e-09	1e-09	1e-09	0.000461302	1e-09	1e-09
VF0157	flagellar P-ring protein precursor FlgI	1e-09	1e-09	1e-09	1e-09	1e-09	1e-09	0.000702893	1e-09	0.00050536	0.000377409	0.000234591	0.000172661	1e-09	1e-09	1e-09	1e-09	1e-09	1e-09	1e-09	1e-09	1e-09	0.000461302	1e-09	1e-09
VF0430	flagellar P-ring protein precursor FlgI	1e-09	1e-09	1e-09	1e-09	1e-09	1e-09	0.000702893	1e-09	0.00050536	0.000377409	0.000234591	0.000172661	1e-09	1e-09	1e-09	1e-09	1e-09	1e-09	1e-09	1e-09	1e-09	0.000461302	1e-09	1e-09
VF0089	rhamnosyltransferase 2	1e-09	1e-09	1e-09	1e-09	1e-09	1e-09	0.000349781	0.000198616	0.000440094	0.000845144	0.00011674	1e-09	1e-09	1e-09	1e-09	1e-09	1e-09	1e-09	0.000102913	0.000121886	1e-09	1e-09	9.11274e-05	1e-09
VF0114	pseudaminic acid biosynthesis PseA protein	1e-09	1e-09	1e-09	1e-09	0.000313292	1e-09	0.000150008	0.000766605	0.000404442	0.000362451	0.000150196	0.00022109	1e-09	1e-09	1e-09	1e-09	1e-09	0.000108735	1e-09	0.000156816	0.000196207	1e-09	0.000234485	1e-09
VF0171	N,N'-diacetyllegionaminate synthase	1e-09	1e-09	1e-09	1e-09	0.000560508	1e-09	0.000178919	0.000304784	0.000675344	0.000360254	0.000179142	0.000593324	0.000140387	1e-09	0.00016217	1e-09	0.00034361	0.000194536	1e-09	1e-09	0.000409537	0.000528401	1e-09	1e-09
VF0274	N-acetylneuraminate synthase	1e-09	1e-09	1e-09	1e-09	0.000560508	1e-09	0.000178919	0.000304784	0.000675344	0.000360254	0.000179142	0.000593324	0.000140387	1e-09	0.00016217	1e-09	0.00034361	0.000194536	1e-09	1e-09	0.000409537	0.000528401	1e-09	1e-09
VF0326	sialic acid synthase	1e-09	1e-09	1e-09	1e-09	0.000560508	1e-09	0.000178919	0.000304784	0.000675344	0.000360254	0.000179142	0.000593324	0.000140387	1e-09	0.00016217	1e-09	0.00034361	0.000194536	1e-09	1e-09	0.000409537	0.000528401	1e-09	1e-09
VF0608	pseudaminic acid synthase	1e-09	1e-09	1e-09	1e-09	0.000560508	1e-09	0.000178919	0.000304784	0.000675344	0.000360254	0.000179142	0.000593324	0.000140387	1e-09	0.00016217	1e-09	0.00034361	0.000194536	1e-09	1e-09	0.000409537	0.000528401	1e-09	1e-09
VF0078	glycosyltransferase family 2 protein	1e-09	1e-09	1e-09	1e-09	0.000229375	1e-09	0.000439308	0.000187089	0.000355331	0.000176911	1e-09	0.000647477	1e-09	1e-09	1e-09	1e-09	1e-09	0.000159219	1e-09	0.000229623	0.000287303	0.000216236	1e-09	0.00042714
VF0035	RNA polymerase sigma factor	1e-09	1e-09	1e-09	1e-09	1e-09	1e-09	0.000337004	1e-09	0.000181722	1e-09	0.000674848	0.000248348	1e-09	1e-09	1e-09	1e-09	1e-09	1e-09	0.00029746	1e-09	1e-09	1e-09	1e-09	1e-09
VF0299	Isochorismate synthase MbtI	1e-09	1e-09	1e-09	1e-09	1e-09	1e-09	1e-09	1e-09	0.000102836	0.000153597	0.000190946	0.000702688	1e-09	1e-09	1e-09	1e-09	1e-09	1e-09	1e-09	0.000199363	1e-09	1e-09	0.000894311	1e-09
